# Supplementary material for: Following the structural changes during zinc-induced crystallization of charged membranes using time-resolved solution X-ray scattering
Source: Royal Society of Chemistry journal article supplement (doi:10.1039/c0sm00824a), 2010-12-16
Supplement: c0sm00824a.pdf [file c0sm00824a.pdf]

## Following the structural changes during zinc-induced crystallization of charged membranes using time-resolved solution X-ray scattering

Moshe Nadler<sup>1</sup>, Ariel Steiner<sup>1</sup>, Tom Dvir<sup>1,2</sup>, Or Szekely<sup>1</sup>, Pablo Szekely<sup>1,2</sup>, Avi Ginsburg<sup>1</sup>, Roi Asor<sup>1</sup>, Roy Resh<sup>1,2</sup>, Carmen Tamburu<sup>1</sup>, Menahem Peres<sup>1</sup> and Uri Raviv<sup>1,\*</sup>

1. The Institute of Chemistry, 2. The Racah Institute of Physics,  
The Hebrew University of Jerusalem, Edmond J. Safra Campus, Givat Ram,  
91904 Jerusalem, Israel

\* Corresponding Author: raviv@chem.ch.huji.ac.il

### Electronic Supplementary Information (ESI)

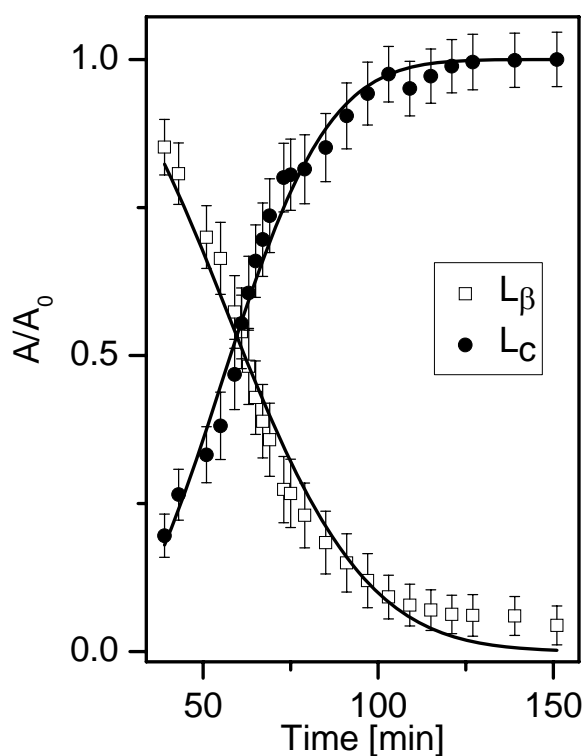

**Figure 1S.** The change in the normalized integrated intensity ( $A/A_0$ , symbols) under the first order lamellar Bragg peaks, after the addition of 100 mM  $\text{ZnCl}_2$  to the DLPS dispersion, as a function of the time elapsed after the addition. The solid lines are a fit to the Avrami model. The results and the fit are divided by the integrated intensity at infinite time,  $A_0$ , as obtained individually for each phase from the fit. The  $L_\beta$  to  $L_C$  phase transition has the Avrami parameter  $n = 2.3 \pm 0.2$ ,  $k = (1.5 \pm 1) \times 10^{-4} \text{ min}^{-2}$  and  $t_i = 10 \pm 5 \text{ min}$ . The data was measured at the ID02 beam-line at ESRF.

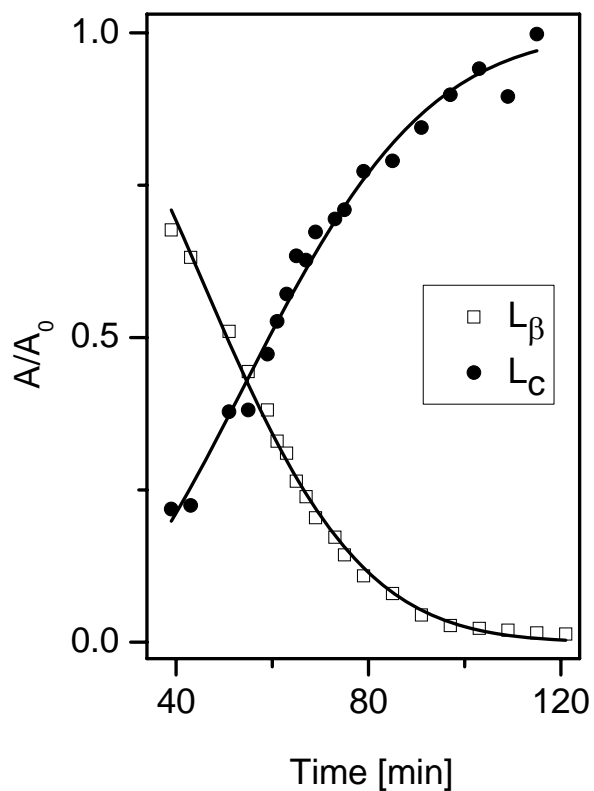

**Figure 2S.** The change in the normalized integrated intensity ( $A/A_0$ , symbols) under the second order lamellar Bragg peaks, after the addition of 100 mM  $ZnCl_2$  to the DLPS dispersion, as a function of the time elapsed after the addition. The solid lines are a fit to the Avrami model. The results and the fit are divided by the integrated intensity at infinite time  $A_0$ , as obtained individually for each phase from the fit. The  $L_\beta$  to  $L_C$  phase transition has the Avrami parameter  $n = 2.1 \pm 0.2$ ,  $k = (1.5 \pm 1) \times 10^{-4} \text{ min}^{-2}$  and  $t_i = 10 \pm 5 \text{ min}$ . The data was measured at the ID02 beamline at ESRF.
